# Supplementary material for: Development of Quality Indicators in the Management of Breast Cancer: A Systematic Review
Source: Research Square preprint supplement (doi:10.21203/rs.3.rs-1356097/v1), 2022-03-21
Supplement: Supplementary file 1 [file d1a0e2f68e81396e713eedfc.docx]

**APPENDICES**

**Search Strategy**

**2.0 MEDLINE (OVID) DATABASE**

| No | Search |
| --- | --- |
| 1 | exp Breast Neoplasms/ |
| 2 | breast cancer.ab,ti,tw. |
| 3 | (breast cancer or breast tumour or breast carcinoma or breast carcino* or breast malignancy or breast malignan* or breast mass or breast tumo* or breast malignan*).af. |
| 4 | 1 or 2 or 3 |
| 5 | exp Diagnosis, Differential/ or exp Diagnostic Imaging/ |
| 6 | radiotherapy/ or exp brachytherapy/ or exp chemoradiotherapy/ or exp radiosurgery/ or exp radiotherapy, adjuvant/ or exp radiotherapy, computer-assisted/ or exp radiotherapy dosage/ or exp radiotherapy, high-energy/ or exp radiotherapy, image-guided/ or exp whole-body irradiation/ or exp x-ray therapy/ or rehabilitation/ |
| 7 | exp Surgical Oncology/ or exp Pathology, Surgical/ or exp Reconstructive Surgical Procedures/ |
| 8 | exp Drug Therapy/ |
| 9 | (drug therapy or chemotherapy or adjuvant or hormone replacement therapy or estrogen replacement therapy or radiotherapy or brachytherapy or high-energy or rehabilitation or surgical procedures or surgical operation or mastectomy or reconstructive surgical procedures or diagnosis).ab,ti,tw. |
| 10 | 7 or 8 or 9 |
| 11 | quality indicators, health care/ or "standard of care"/ or benchmarking/ or total quality management/ or exp quality indicators, health care/ |
| 12 | guideline adherence/ or patient outcome assessment/ or process assessment, health care/ or peer review, health care/ |
| 13 | (quality indicator or quality performance or process indicator or structural indicator or outcome indicator).ab,ti. |
| 14 | 11 or 12 or 13 |
| 15 | 1. and 10 and 14 |

**3.0 Database CINAHL:** Interface - EBSCOhost Research Databases

| # | Query |
| --- | --- |
| S4 | S1 AND S2 AND S3 |
| S3 | MW quality indicator OR AB ( quality indicator or quality performance or process indicator or structural indicator or outcome indicator ) OR AB ( guideline adherence or quality audit or quality improvement ) OR TI quality indicator |
| S2 | MW radiotherapy OR MW brachytherapy OR MW (chemotherapy or hormone therapy or estrogen therapy ) OR AB ( diagnosis or chemotherapy or radiotherapy or brachytherapy or oncology surgery ) OR oncology surgery |
| S1 | MW breast cancer OR TI ( breast cancer or breast neoplasm or breast malignancy or breast mass or breast tumor ) OR AB ( breast tumo* or breast malignan* or breast neoplas* ) |

**4.0. Database Search Name: Cochrane**

| **ID** | **Comment: Search** |
| --- | --- |
| #1 | ("breast cancer"):ti,ab,kw OR (breast tumo* or breast carcinoma or breast malignan* or breast mass or):ti,ab,kw (Word variations have been searched) |
| #2 | MeSH descriptor: [Breast Neoplasms] this term only |
| #3 | #1 or #2 |
| #4 | MeSH descriptor: [Diagnosis] explode all trees |
| #5 | MeSH descriptor: [Radiotherapy] explode all trees |
| #6 | MeSH descriptor: [Surgical Oncology] 1 tree(s) exploded |
| #7 | MeSH descriptor: [Chemoradiotherapy] explode all trees |
| #8 | (surgical procedure):ti,ab,kw OR (brachytherapy):ti,ab,kw OR (radiotherapy):ti,ab,kw OR ("hormone therapy"):ti,ab,kw OR ("estrogen replacement therapy"):ti,ab,kw |
| #9 | #4 or #5 or #6 or #7 or #8 |
| #10 | MeSH descriptor: [Quality Indicators, Health Care]  1 tree(s) exploded |
| #11 | (quality indicator or quality performance or process indicator or structural indicator or outcome indicator):ti,ab,kw |
| #12 | #10 or #11 |
| #13 | #3 AND #9 AND #12 |
